# Supplementary material
Source: PubMed Central journal article supplement (PMC5699924)
Supplement: NIHMS916046-supplement-Supplement.pdf [file NIHMS916046-supplement-Supplement.pdf]

## CORRECTION NOTICE

*Nat. Med.* 23, 631–637 (2017)

### The cold-induced lipokine 12,13-diHOME promotes fatty acid transport into brown adipose tissue

Ronald J Hause, Colin C Pritchard, Jay Shendure & Stephen J Salipante Matthew D Lynes, Luiz O Leiria, Morten Lundh, Alexander Bartelt, Farnaz Shamsi, Tian Lian Huang, Hirokazu Takahashi, Michael F Hirshman, Christian Schlein, Alexandra Lee, Lisa A Baer, Francis J May, Fei Gao, Niven R Narain, Emily Y Chen, Michael A Kiebish, Aaron M Cypess, Matthias Blüher, Laurie J Goodyear, Gökhan S Hotamisligil, Kristin I Stanford & Yu-Hua Tseng

The incorrect raw western blot was used in Supplementary Figure 7 to reflect the blot for FATP1 in Figure 4e. Rather than simply replacing the Supplementary Information with the correct raw western blot, the authors provided all three replicates.

---

**a**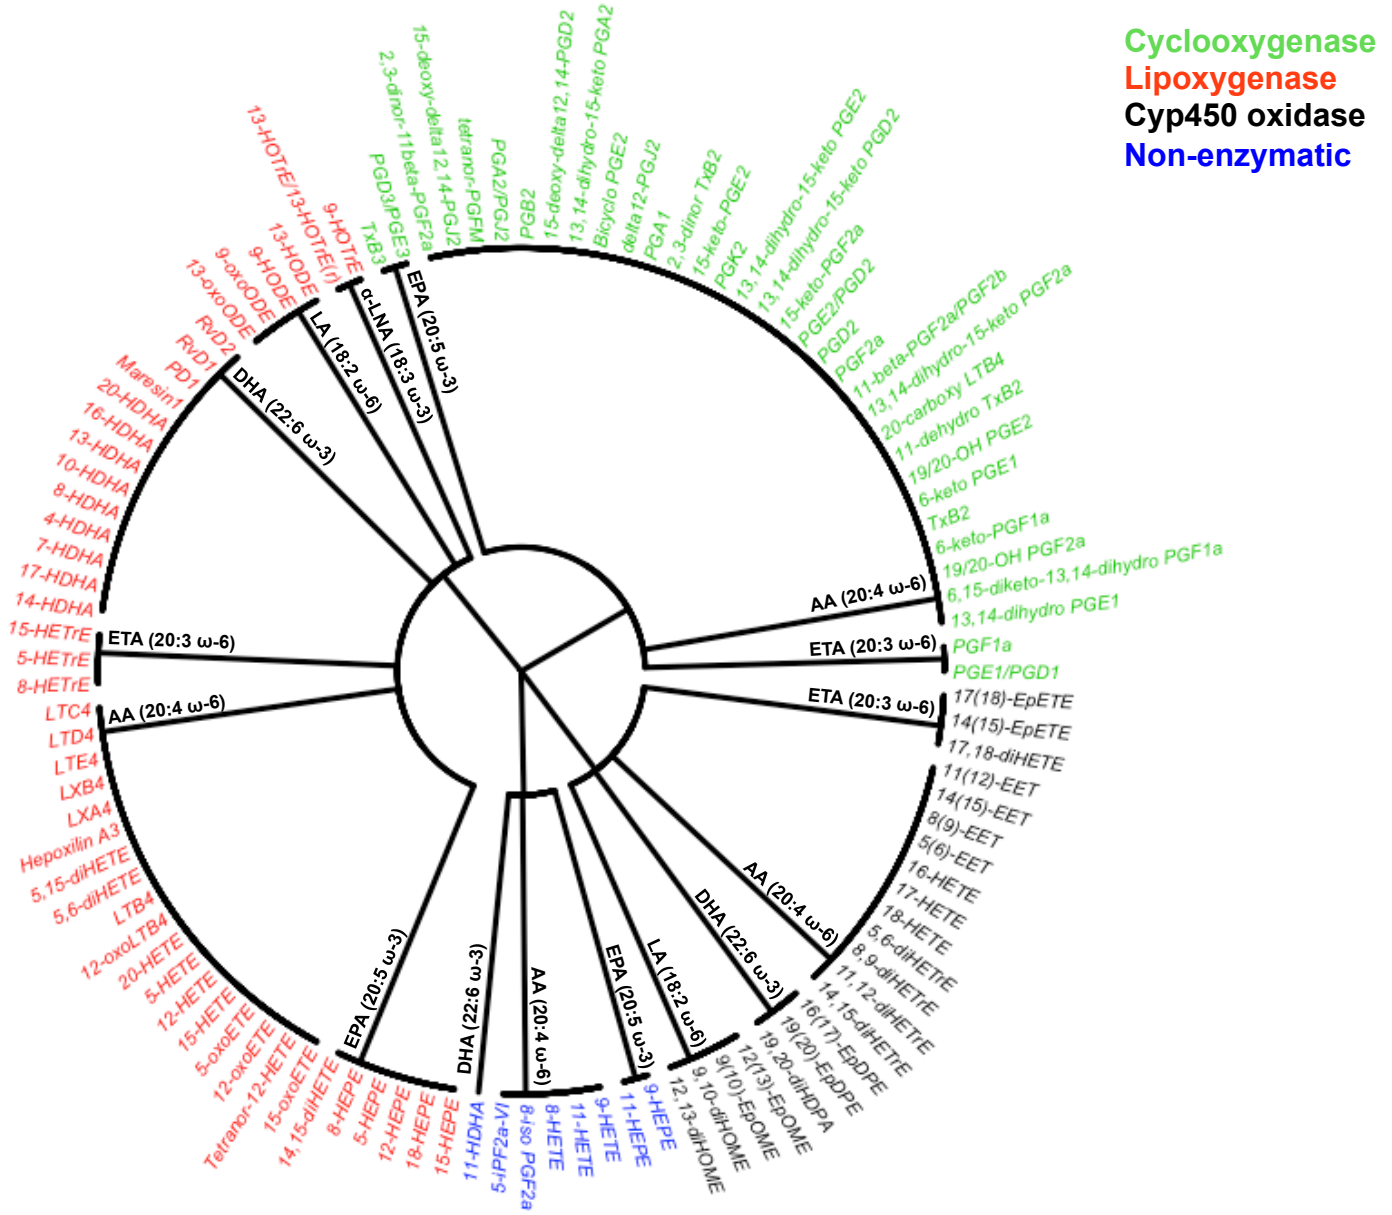**b****Inflammatory effect**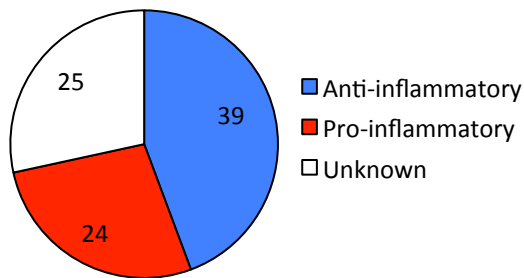**Supplementary Figure 1**

Annotation of lipid species profiled by LC-/MS in human and mouse serum and mouse adipose tissues. **(a)** Dendrogram of all lipids included in the initial screen according to their original fatty acid and enzymatic pathway. **(b)** For all lipid species measured by LC-MS/MS annotation of, whether the lipid was pro- or anti-inflammatory.

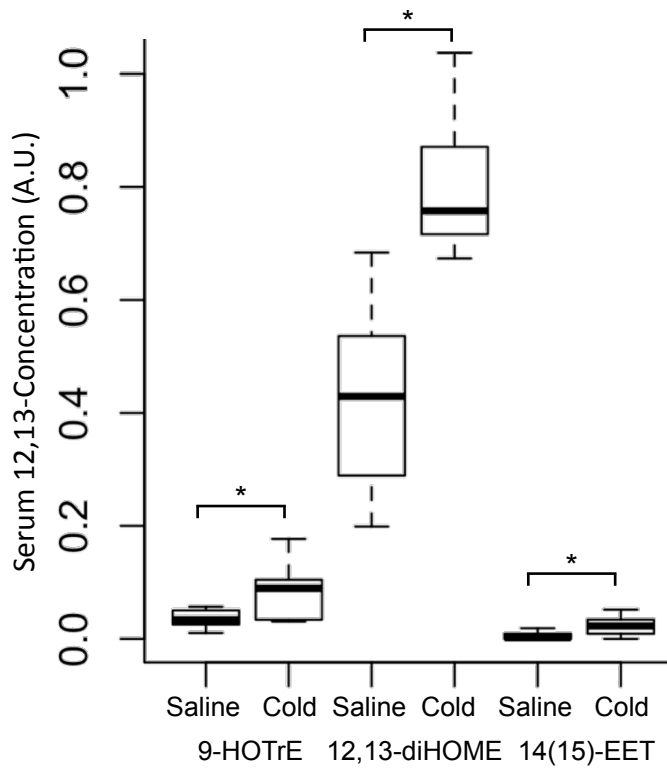

## Supplementary Figure 2

Lipid species increased by a one-hour cold challenge. The increase in abundance of three lipid species reached a nominal  $P$  value of 0.05 after cold exposure. The two species with lower significance were only detectable after cold exposure. Data are means  $\pm$  s.e.m.;  $n = 9$  individual subjects;  $*P < 0.05$  by paired Student's  $t$ -test.

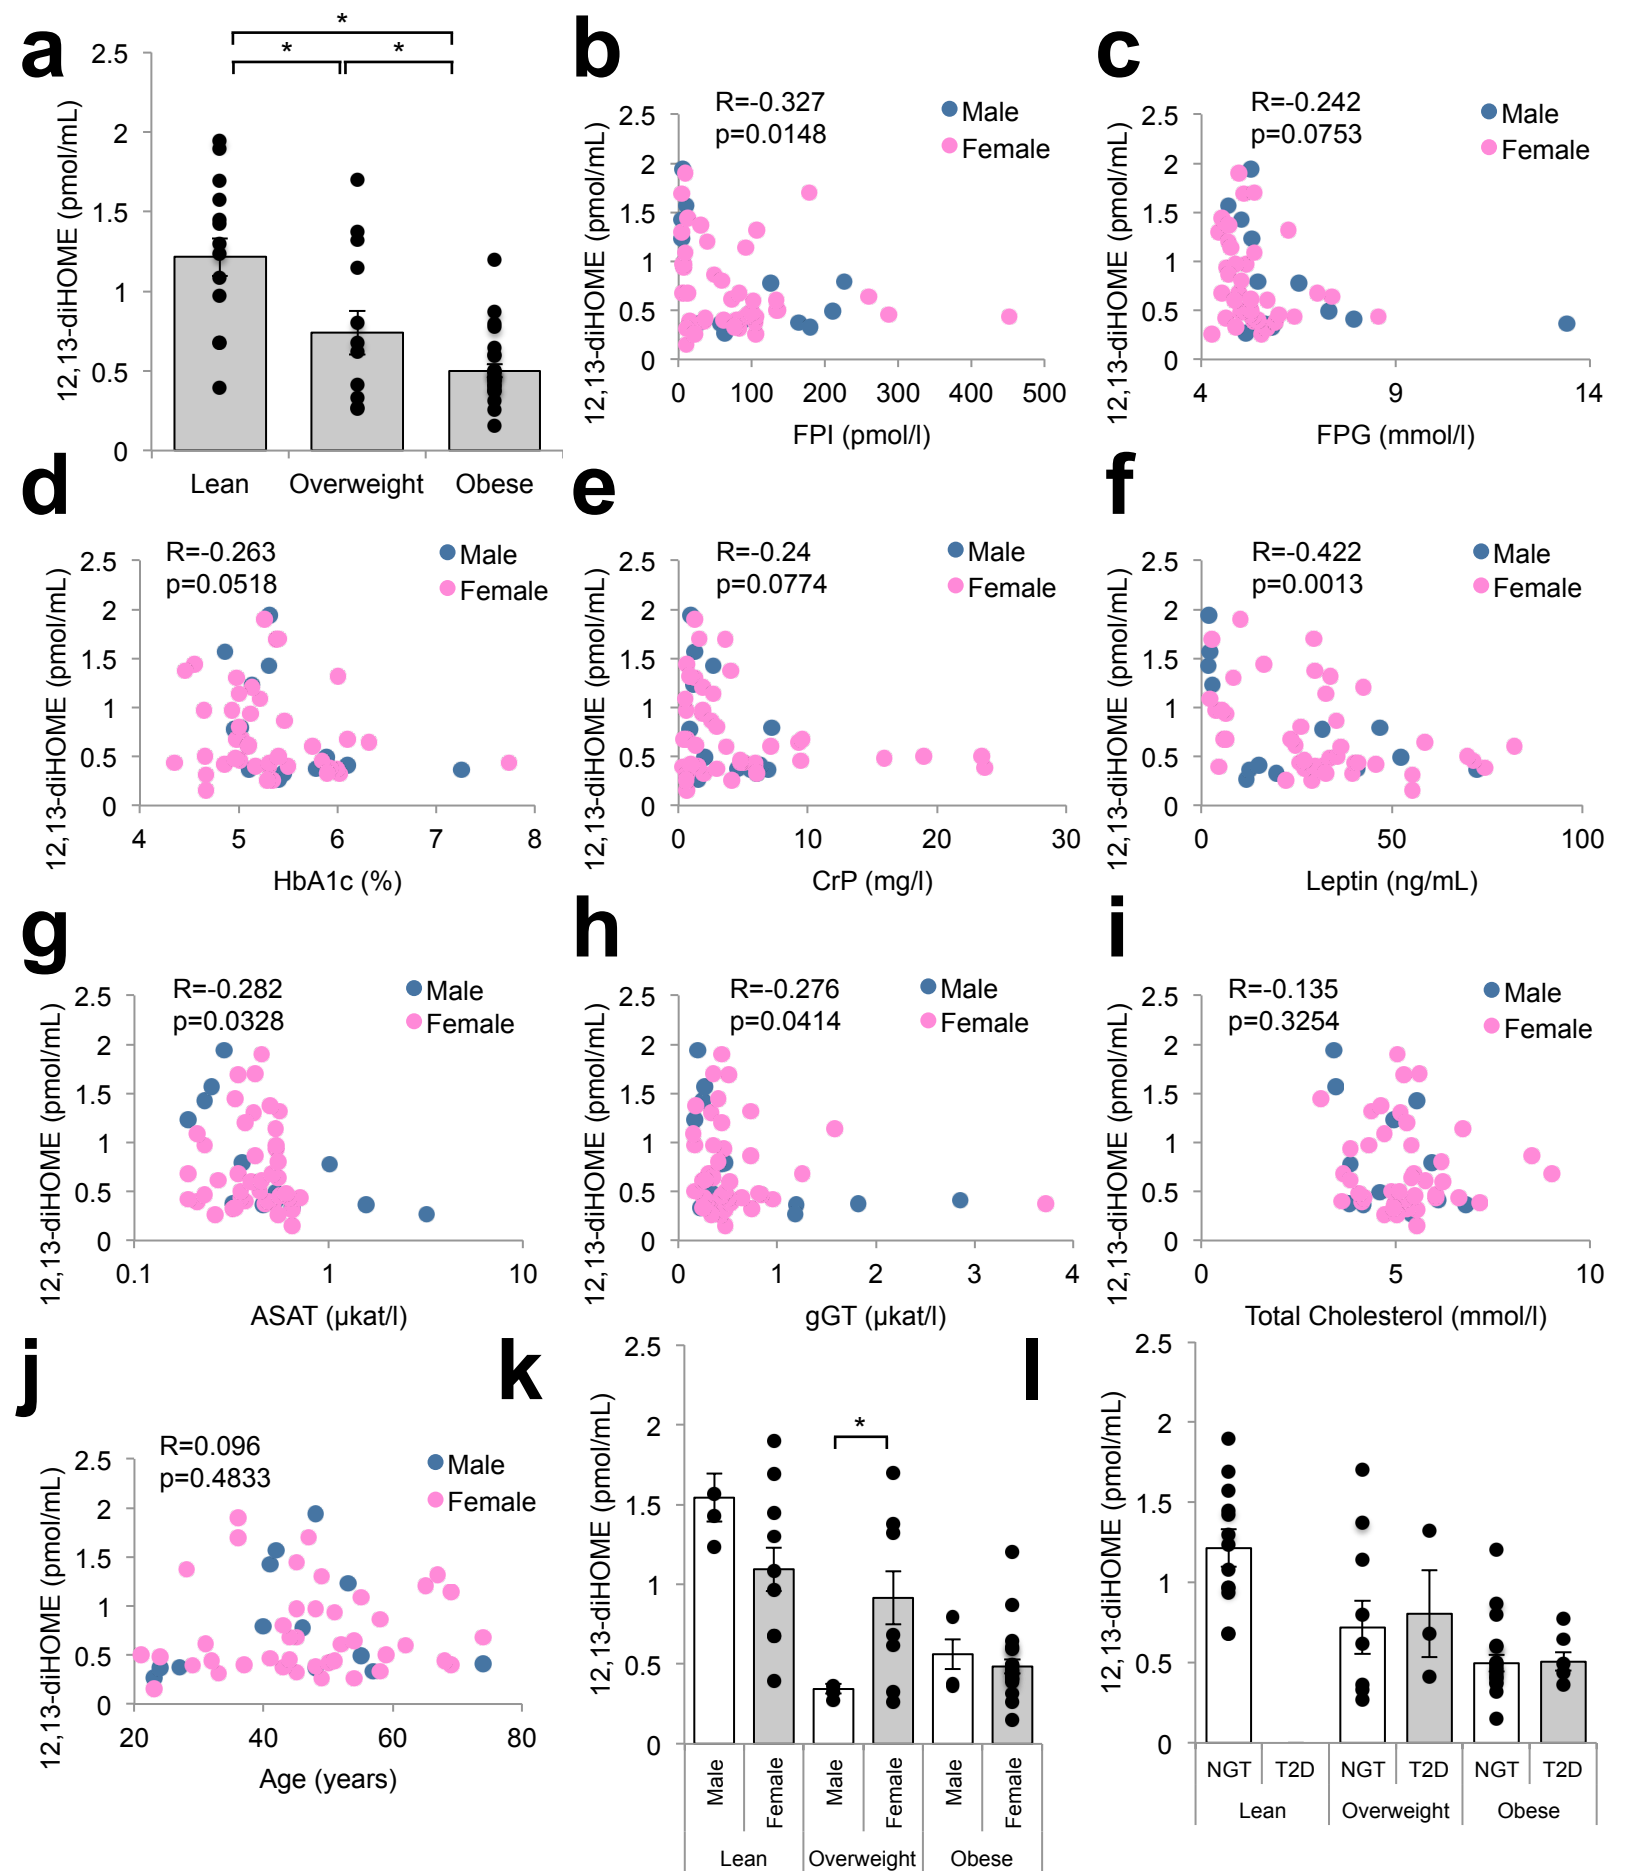

### Supplementary Figure 3

Anthropometric correlates of 12,13-diHOME. **(a)** Circulating 12,13-diHOME in each body mass index (BMI) category. Data are presented as normalized means  $\pm$  s.e.m.;  $n = 15$  lean, 13 overweight and 27 obese subjects. **(b-j)**, Circulating 12,13-diHOME concentration plotted against fasting plasma insulin (FPI) **(b)**, fasting plasma glucose (FPG) **(c)**, hemoglobin A1c (HbA1c) **(d)**, C-reactive protein (CrP) **(e)**, circulating leptin **(f)**, circulating aspartate transaminase (ASAT) **(g)**, and circulating gamma-glutamyl transpeptidase (gGT) **(h)**, circulating total cholesterol **(i)** and age **(j)**. In each panel,  $R$  is the Spearman correlation coefficient and males are shown in blue while females are shown in pink;  $n = 55$  individual subjects (13 M/42 F). **(k)** Circulating 12,13-diHOME in each BMI category of males and females. Data are presented as normalized means  $\pm$  s.e.m.;  $n = 15$  lean (4 M/11 F), 13 overweight (4 M/9 F) and 27 obese subjects (5 M/22 F);  $*P < 0.05$  by Student's  $t$ -test. **(l)** Circulating 12,13-diHOME in each BMI category of subjects with normal glucose tolerance (NGT) or Type 2 diabetes (T2D). Data are presented as normalized means  $\pm$  s.e.m.;  $n = 15$  lean, 13 overweight (10 NGT/3 T2D) and 27 obese subjects (20 NGT/7 T2D).

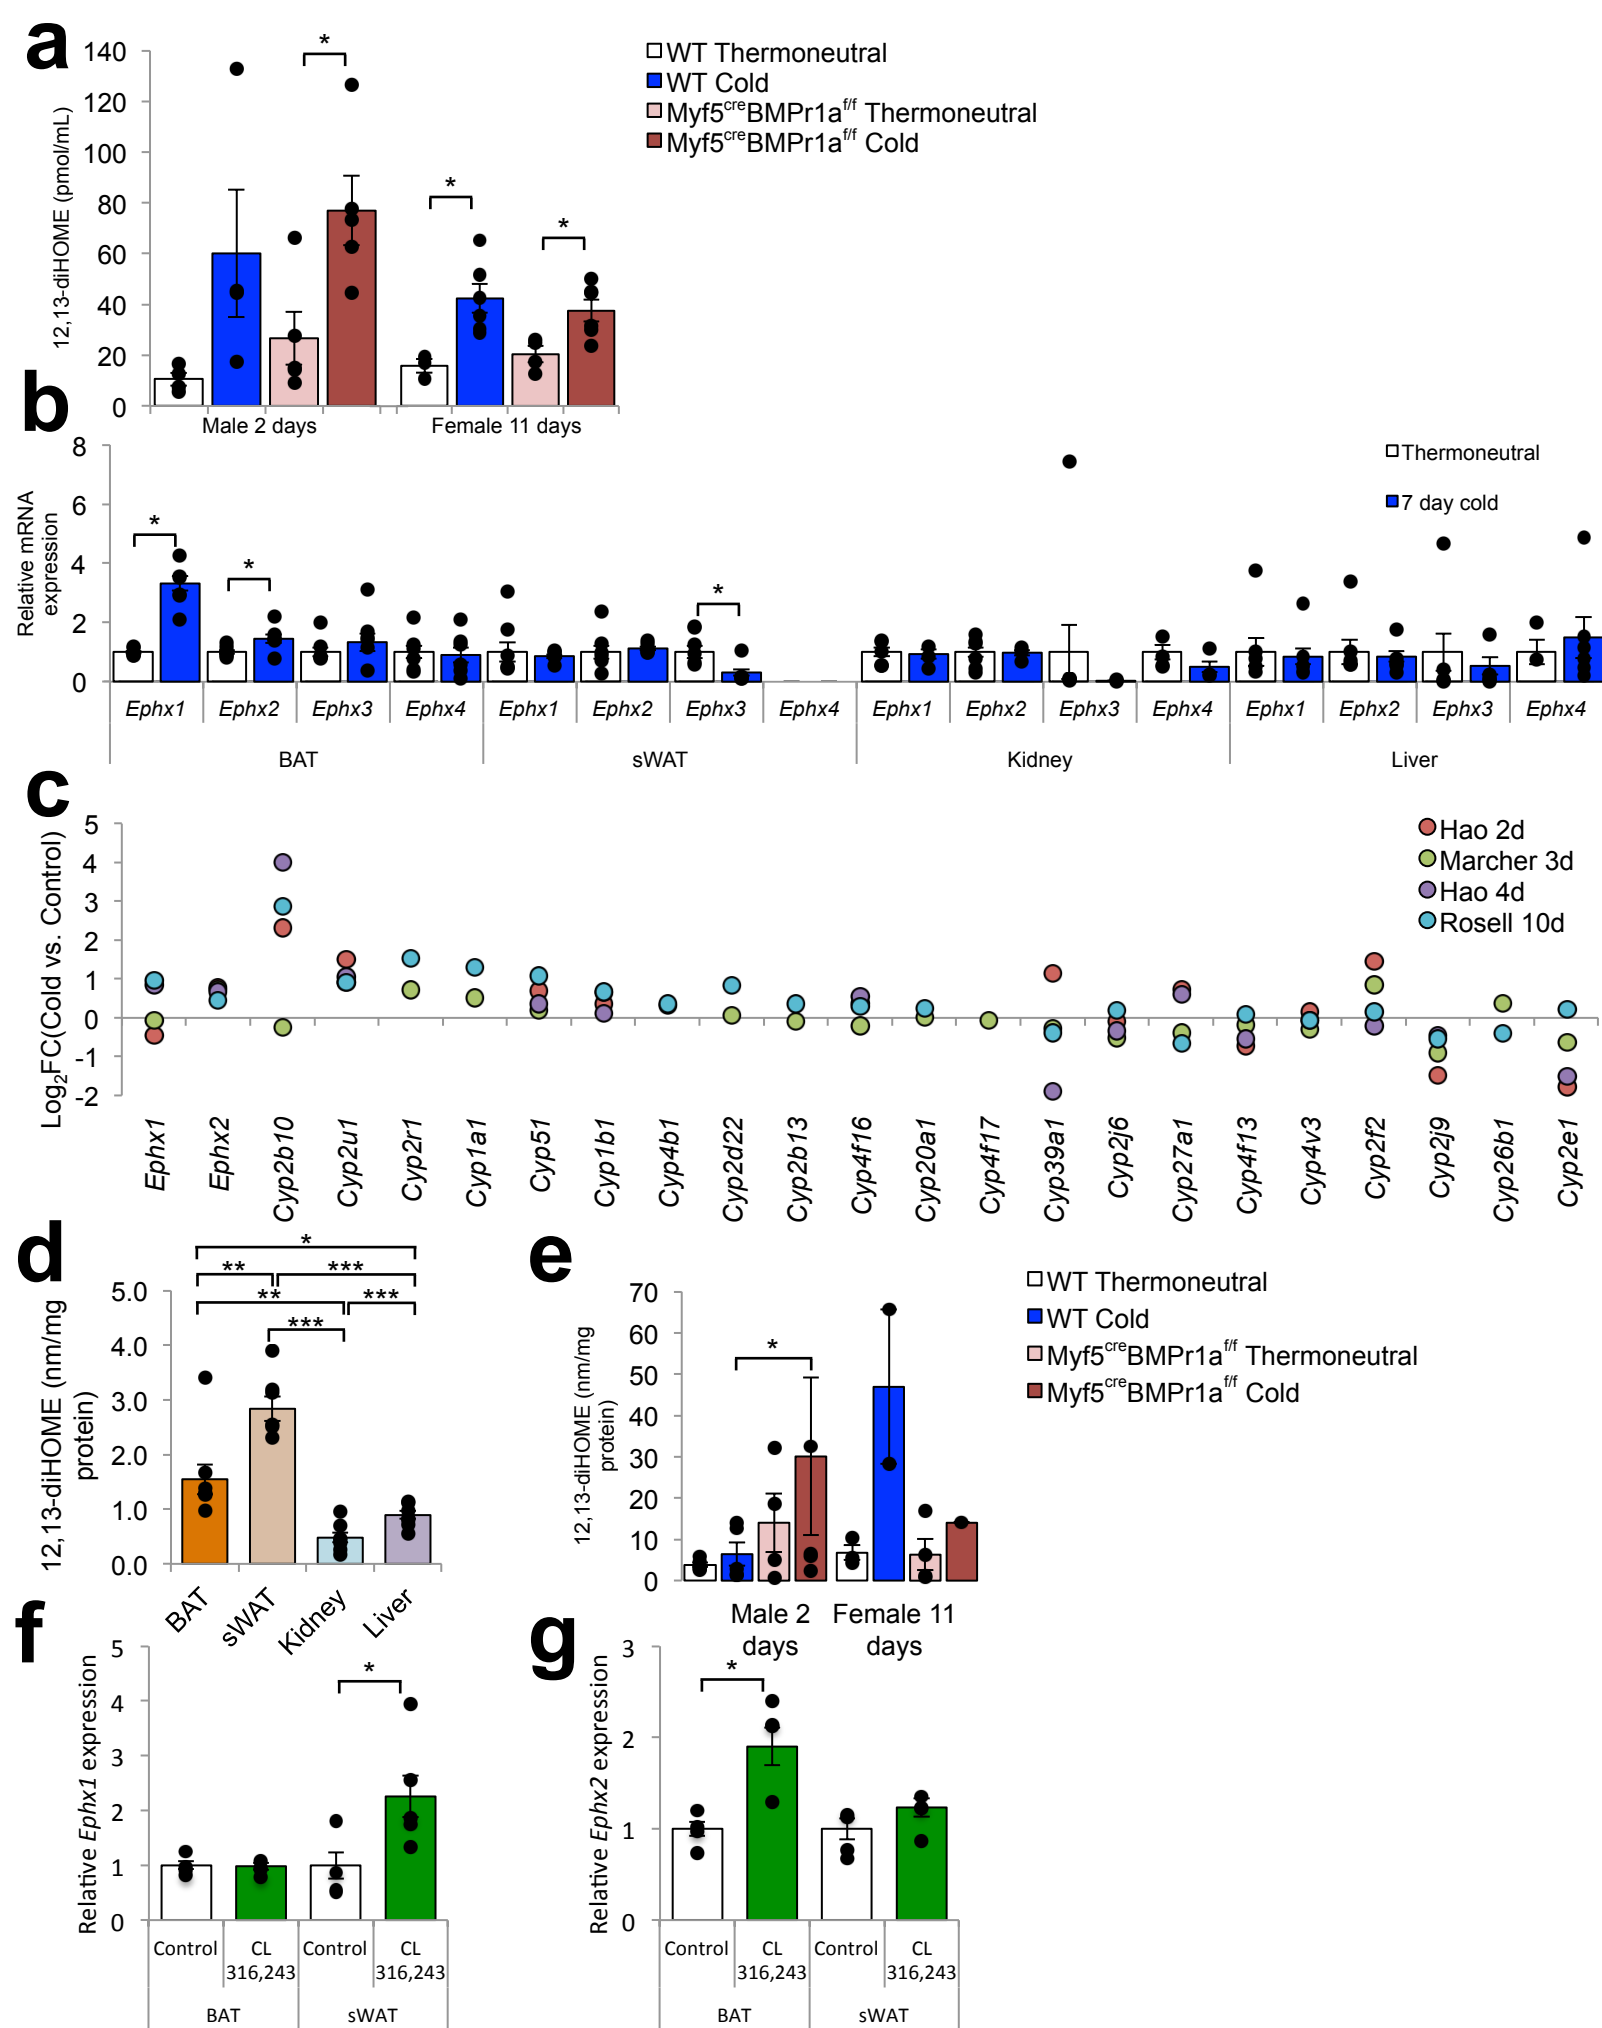

## Supplementary Figure 4

12,13-biosynthesis in cold activated adipose tissue. **(a)** 12,13-diHOME concentrations measured by LC-MS/MS in serum from wild type and *Myf5<sup>cre</sup>BMP1 $\alpha$ <sup>f/f</sup>* mice housed at cold or thermoneutral for 2 or 11 days. Data are plotted as the normalized means  $\pm$  s.e.m.;  $n = 5$  WT thermoneutral males, 3 WT cold males, 4 *Myf5<sup>cre</sup>BMP1 $\alpha$ <sup>f/f</sup>* thermoneutral males, 5 *Myf5<sup>cre</sup>BMP1 $\alpha$ <sup>f/f</sup>* cold males, 3 WT thermoneutral females, 5 WT cold females, 3 *Myf5<sup>cre</sup>BMP1 $\alpha$ <sup>f/f</sup>* thermoneutral females, 4 *Myf5<sup>cre</sup>BMP1 $\alpha$ <sup>f/f</sup>* cold female;  $*P < 0.05$  by Student's *t*-test. **(b)** *Ephx* family gene expression measured by qPCR in different tissues from mice housed at cold or thermoneutrality for 7 days. Data are plotted as the means normalized to thermoneutrality  $\pm$  s.e.m.;  $n = 8$  per group;  $*P < 0.05$  by Student's *t*-test. **(c)** Meta-analysis of 4 publically available BAT gene expression datasets from mice exposed to cold for different lengths of time for genes in the 12,13-diHOME biosynthetic pathway. The induction by cold of each gene after cold exposure is shown by increased fold change on the y axis. **(d)** 12,13-diHOME concentrations measured in different mouse tissues. Data are means  $\pm$  s.e.m.;  $n = 8$  mice;  $*P < 0.05$ ,  $**P < 0.005$ ,  $***P < 0.0005$  by Student's *t*-test. **(e)** 12,13-diHOME concentrations measured by LC-MS/MS in sWAT from wild type and *Myf5<sup>cre</sup>BMP1 $\alpha$ <sup>f/f</sup>* mice housed at cold or thermoneutral for 2 or 11 days. Data are plotted as the normalized means  $\pm$  s.e.m.;  $n = 5$  WT thermoneutral males, 5 WT cold males, 4 *Myf5<sup>cre</sup>BMP1 $\alpha$ <sup>f/f</sup>* thermoneutral males, 5 *Myf5<sup>cre</sup>BMP1 $\alpha$ <sup>f/f</sup>* cold males, 3 WT thermoneutral females, 2 WT cold females, 4 *Myf5<sup>cre</sup>BMP1 $\alpha$ <sup>f/f</sup>* thermoneutral females, 1 *Myf5<sup>cre</sup>BMP1 $\alpha$ <sup>f/f</sup>* cold female;  $*P < 0.05$  by Student's *t*-test. **(f)** *Ephx1* gene expression measured by qPCR in BAT and sWAT from mice treated daily with 1 mg/kg body weight CL316,243 intraperitoneally for 10 days. Data are presented as normalized means  $\pm$  s.e.m.;  $n = 6$  per group;  $*P < 0.05$  by Student's *t*-test. **(g)** *Ephx2* gene expression measured by qPCR in BAT and sWAT from mice treated daily with 1 mg/kg body weight CL 316,243 intraperitoneally for 10 days. Data are presented as normalized means  $\pm$  s.e.m.;  $n = 6$  per group;  $*P < 0.05$  by Student's *t*-test.

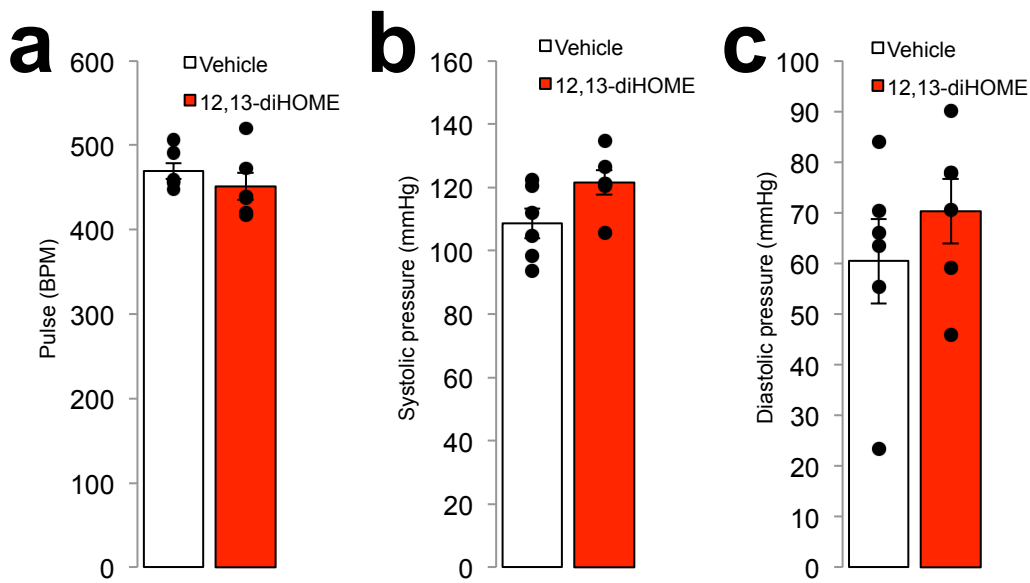

### Supplementary Figure 5

Physiologic effects of acute 12,13-diHOME treatment in mice. **(a)** Pulse measured in the tail after pretreatment with 12,13-diHOME or vehicle. Data are means  $\pm$  s.e.m.;  $n = 6$  per group. **(b)** Systolic pressure measured in the tail vein after pretreatment with 12,13-diHOME or vehicle. Data are means  $\pm$  s.e.m.;  $n = 6$  per group. **(c)** Diastolic pressure measured in the tail after pretreatment with 12,13-diHOME or vehicle. Data are means  $\pm$  s.e.m.;  $n = 6$  per group.



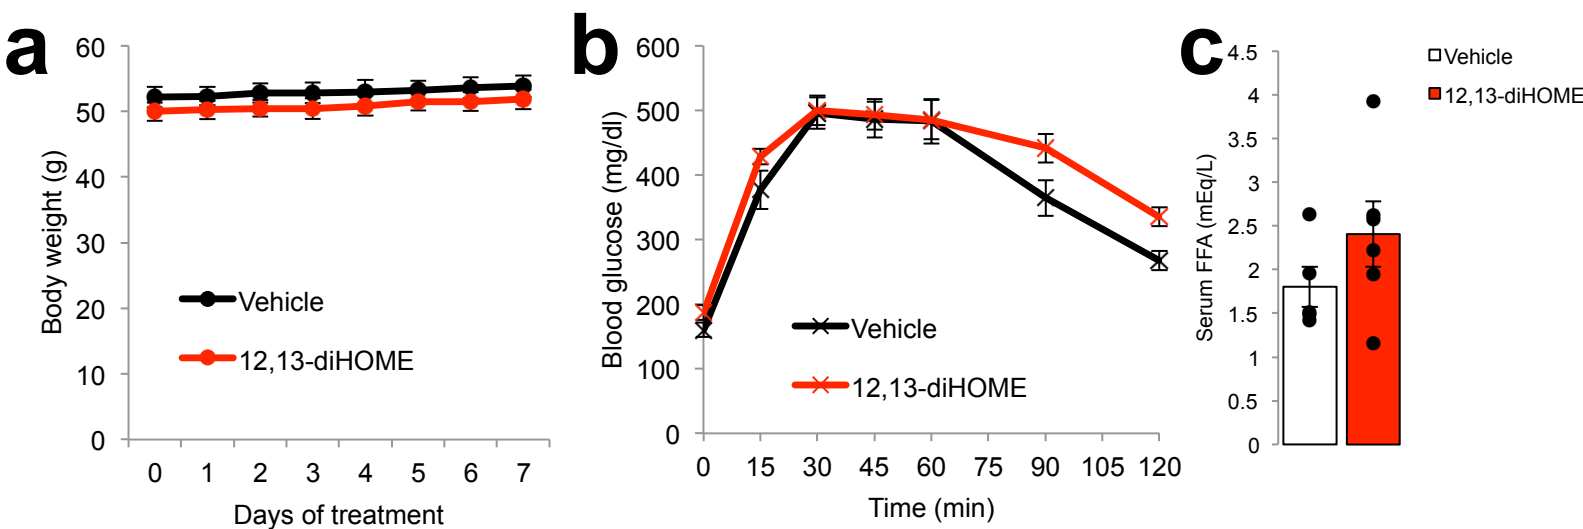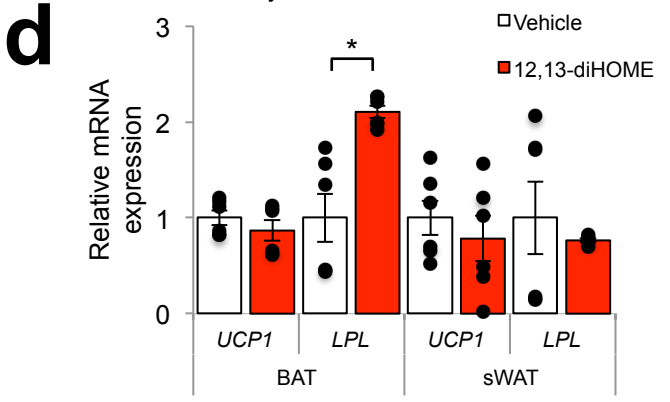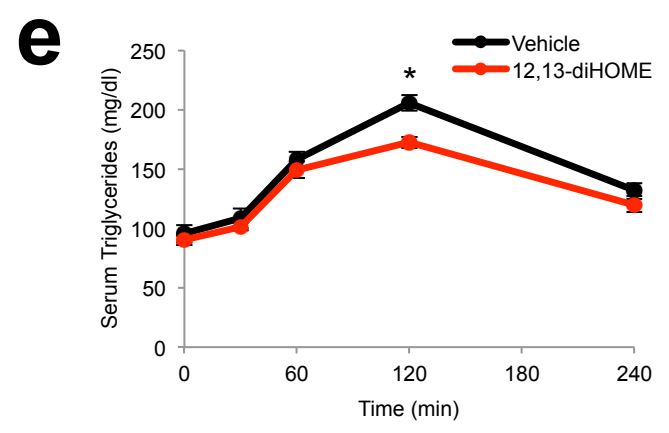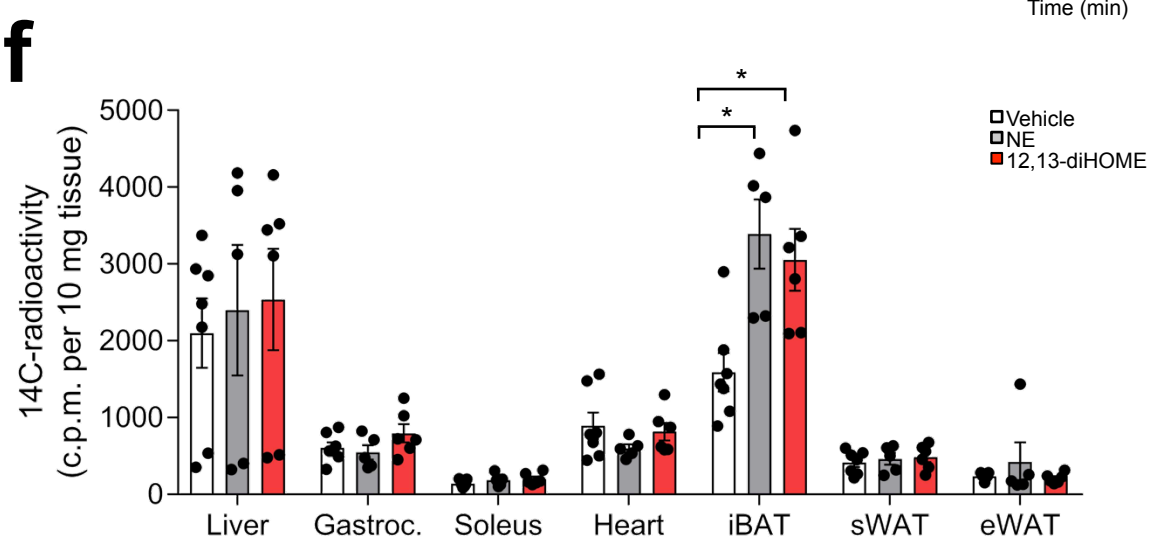

## Supplementary Figure 6

Physiologic effects of daily 12,13-diHOME injections. **(a)** Body weights over 7 day course of daily injection treatment. Data are means  $\pm$  s.e.m.;  $n = 6$  treated vs. 5 controls. **(b)** Glucose tolerance test of a separate cohort of diet-induced obesity mice treated every other day for 2 weeks with either 12,13-diHOME or vehicle. Data are means  $\pm$  s.e.m.;  $n = 5$  per group. **(c)** Serum non-esterified free fatty acids (FFA) of mice treated daily for one week with either 12,13-diHOME or vehicle. Data are means  $\pm$  s.e.m.;  $n = 6$  treated vs. 5 controls. **(d)** mRNA expression measured by qPCR of *UCP1* and *LPL* in tissue from mice treated every other day for two weeks with either 12,13-diHOME or vehicle. Data are means  $\pm$  s.e.m.;  $n = 6$  treated per group;  $*P < 0.05$  by Student's *t*-test. **(e)** Oral lipid tolerance test showing serum triglyceride concentration from mice treated with vehicle or 12,13-diHOME and then given an oral bolus of triglyceride. Data are means  $\pm$  s.e.m.;  $n = 6$  per group;  $*P < 0.05$  by ANOVA with post-hoc Bonferroni test. **(f)** Radioactivity per 10 mg of tissues from mice treated with vehicle, Norepinephrine (NE) or 12,13-diHOME and then given a bolus of radiolabeled glucose. Tissues were measured by scintillation counting in liver, gastrocnemius muscle (Gastroc), soleus muscle, heart, BAT, sWAT, and epididymal white adipose tissue (eWAT). Data are means  $\pm$  s.e.m.;  $n = 8$  per group;  $*P < 0.05$  12,13-diHOME vs. Vehicle by ANOVA with post-hoc Bonferroni test.

**a** Cytosol Membrane

Control  
Insulin  
12,13-diHOME  
Control  
Insulin  
12,13-diHOME

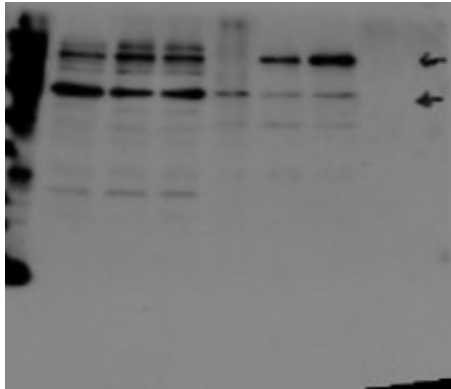

FATP1

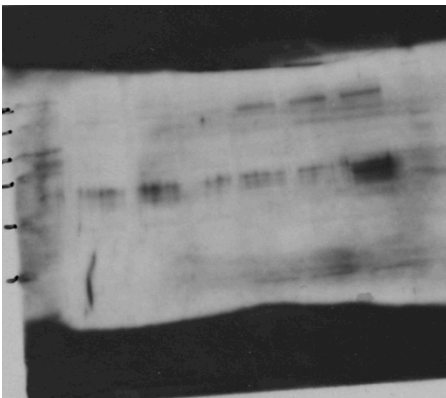

CD36

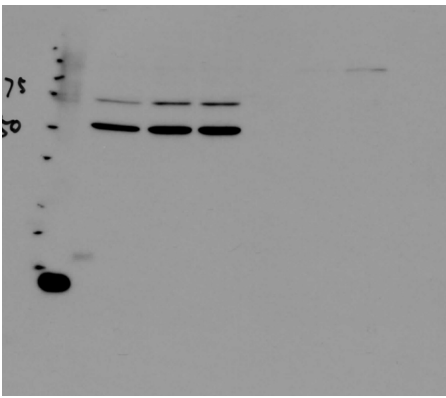

Tubulin

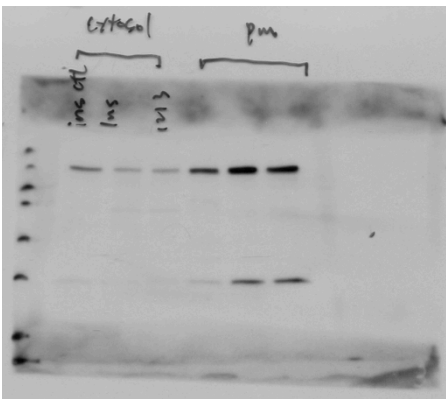

Cadherin

**b** Cytosol Membrane

Control  
Insulin  
12,13-diHOME  
Control  
Insulin  
12,13-diHOME

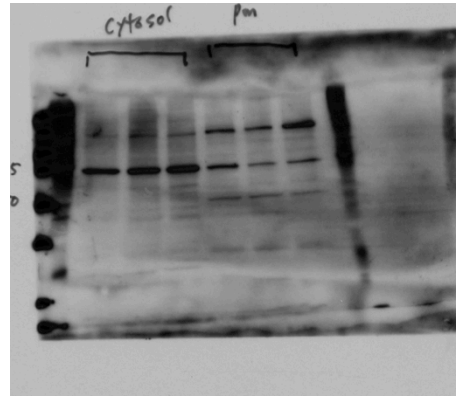

Cytosol Membrane

Control Control Insulin 12,13-diHOME Control Control Insulin 12,13-diHOME

**c**

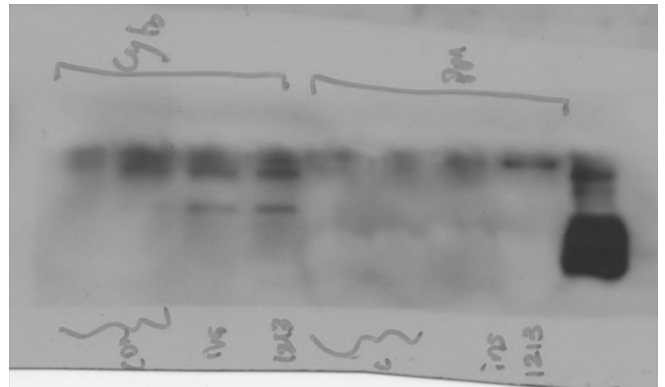

## Supplementary Figure 7

Un-cropped immunoblots shown in this manuscript. **(a)** Experiments shown in Figure 4 **(b)** An independent experimental replicate of the FATP1 immunoblot shown in **a**. **(c)** A third independent experimental replicate of the FATP1 immunoblot shown in **a**. The experimental replicates in **b** and **c** were used to quantify FATP1 translocation as described in the online methods.



## Supplementary Table 2

*P* values for linear model of relationship between each phenotype with BMI as covariate.

| Covariate         | <i>p</i> |
|-------------------|----------|
| Age               | 0.191    |
| FPG               | 0.507    |
| FPI               | 0.747    |
| HOMA-IR           | 0.643    |
| HbA1c             | 0.48     |
| CrP               | 0.73     |
| Leptin            | 0.154    |
| Total.Cholesterol | 0.674    |
| HDL.Cholesterol   | 0.392    |
| LDL.Cholesterol   | 0.788    |
| Triglycerides     | 0.0463   |
| ALAT              | 0.0494   |
| ASAT              | 0.0274   |
| gGT               | 0.138    |

## Supplementary Table 3

### Primer Sequences.

| Primer   | Sequence                | Gene  |
|----------|-------------------------|-------|
| ARBPfor  | TTTGGGCATCACCACGAAA     | ARBP  |
| ARBPrev  | GGACACCCTCCAGAAAGCGA    |       |
| Ephx1for | GGAGACCTTACCACTTGAAGATG | Ephx1 |
| Ephx1rev | GCCCGGAACCTATCTATCCTCT  |       |
| Ephx2for | ACCACTCATGGATGAAAGCTACA | Ephx2 |
| Ephx2rev | TCAGGTAGATTGGCTCCACAG   |       |
| Ephx3for | CAGTGGACTCCGATAGCACG    | Ephx3 |
| Ephx3rev | TGGGACGACTACAGAGCCG     |       |
| Ephx4for | TCCCTGGTGTACGGCTACTG    | Ephx4 |
| Ephx4rev | ATCTTAACCCGGAGTCCTTGA   |       |
| UCP1for  | AGGCTTCCAGTACCATTAGGT   | UCP1  |
| UCP1rev  | CTGAGTGAGGCAAAGCTGATTT  |       |
| LPLfor   | GCCCAGCAACATTATCCAGT    | LPL   |
| LPLrev   | GGTCAGACTTCCTGCTACGC    |       |

## Supplementary Table 4 Antibodies.

| Antibody List                  | Vendor                    | Catalog # |
|--------------------------------|---------------------------|-----------|
| FATP1(ALSVL5, m-100)           | Santa Cruz Biotechnology  | sc-25541  |
| Pan-Cadherin(H-300)            | Santa Cruz Biotechnology  | sc-10733  |
| $\beta$ -Tubulin               | Cell Signaling Technology | 2146      |
| HRP conjugated anti Rabbit IgG | Cell Signaling Technology | 7074      |
| Anti-CD36                      | Santa Cruz Biotechnology  | sc-9154   |



### Supplementary Video 1

Representative imaging of FFA-SS-Luc uptake in UCP1<sup>cre<sup>+</sup>/-</sup>Rosa(stop)Luc<sup>+</sup>/- injected intravenously with luciferin-conjugated fatty acid and 12,13-diHOME or vehicle. Data from individual images using sequential one-minute exposures over approximately 50 minutes was stacked into a movie. The animal on the left is the vehicle treated and the mouse on the right is treated with 12,13-diHOME.

### Supplementary Video 2

Representative imaging of FFA-SS-Luc uptake in CAG-Luc<sup>+/+</sup> brown adipocyte cells treated with 12,13-diHOME or vehicle and then incubate with luciferin-conjugated fatty acid. Data from individual images using sequential 30 second exposures over approximately 50 minutes was stacked into a movie. The well on the left is vehicle treated and the well on the right is treated with 12,13-diHOME.
